# Supplementary material for: Germline and Somatic Whole-Exome Sequencing Identifies New Candidate Genes Involved in Familial Predisposition to Serrated Polyposis Syndrome
Source: MDPI journal article supplement (doi:10.3390/cancers13040929), 2021-02-23
Supplement: s1 [file s1]

**Supplementary Table 1.** Candidate variants and genes selected in the second-round prioritization, based on post manual curation for biological function. A total of 71 variants in 68 genes were prioritized.

| Family | Gene           | Variant                   | Pred. tools | gnomAD     | Biological Process                                                                                                                               |
|--------|----------------|---------------------------|-------------|------------|--------------------------------------------------------------------------------------------------------------------------------------------------|
| SPS.1  | <i>IGFBP5</i>  | c.769G>T p.(Val257Phe)    | 4           | 0.000365   | regulation of cell growth; negative regulation of growth; glucose metabolic process; signal transduction                                         |
|        | <i>LLGL1</i>   | c.2883-1G>C               | N/A         | N/A        | protein complex assembly; exocytosis; Golgi to plasma membrane transport; axonogenesis; cortical actin cytoskeleton organization                 |
|        | <i>PPARD</i>   | c.1093A>G p.(Met365Val)   | 3           | N/A        | negative regulation of transcription from RNA polymerase II promoter; glucose metabolic process                                                  |
|        | <i>WRN</i>     | c.c.2023G>C p.(Glu675Gln) | 4           | 0.00000795 | telomere maintenance; DNA synthesis involved in DNA repair; replicative cell aging; DNA metabolic process                                        |
| SPS.2  | <i>ABI3BP</i>  | c.2923C>T p.(Arg975Trp)   | 3.25        | 0.000101   | positive regulation of cell-substrate adhesion; extracellular matrix organization                                                                |
|        | <i>EWSR1</i>   | c.779A>G p.(Tyr260Cys)    | 4           | N/A        | transcription; regulation of transcription                                                                                                       |
|        | <i>MTHFR</i>   | c.1097G>A p.(Arg366His)   | 6           | 0.0000177  | response to hypoxia; cellular amino acid metabolic process; methionine metabolic process; one-carbon metabolic process                           |
|        | <i>NFATC1</i>  | c.860C>T p.(Pro274Leu)    | 6           | 0.000277   | G1/S transition of mitotic cell cycle; epithelial to mesenchymal transition; transcription from RNA polymerase                                   |
|        | <i>SCUBE2</i>  | c.2873T>A p.(Leu958*)     | 4.25        | N/A        | multicellular organism development                                                                                                               |
| SPS.3  | <i>CFTR</i>    | c.3995C>A p.(Pro1332His)  | 6           | N/A        | transmembrane transport; positive regulation of voltage-gated chloride channel activity                                                          |
|        | <i>NPTX2</i>   | c.1211C>T p.(Pro404Leu))  | 5           | 0.0000538  | chemical synaptic transmission                                                                                                                   |
| SPS.4  | <i>CDH16</i>   | c.1438G>A p.(Glu480Lys)   | 4           | 0.000219   | cell adhesion; calcium-dependent cell-cell adhesion via plasma membrane cell adhesion molecules; cell-cell signaling; nervous system development |
|        | <i>DHX32</i>   | c.35C>T p.(Ser12Phe)      | 3           | 0.0000955  | mRNA splicing, via spliceosome                                                                                                                   |
|        | <i>MCM3AP</i>  | c.1592A>G p.(Glu531Gly)   | 4           | 0.000502   | immune system process; DNA replication; protein import into nucleus; mRNA transport                                                              |
| SPS.5  | <i>WNK2</i>    | c.4820C>T p.(Ala1607Val)  | 5           | 0.0000788  | protein phosphorylation; negative regulation of cell proliferation; regulation of ion homeostasis                                                |
|        | <i>PKMYT1</i>  | c.991G>A p.(Glu331Lys)    | 6           | 0.0000184  | regulation of cyclin-dependent protein serine/threonine kinase activity; G1/S transition of mitotic cell                                         |
|        | <i>PROX1</i>   | c.584C>T p.(Pro195Leu)    | 3           | 0.0000992  | negative regulation of transcription from RNA polymerase II promoter; cell fate determination                                                    |
|        | <i>SMARCC1</i> | c.560T>C p.(Ile187Thr)    | 5           | 0.0000762  | chromatin organization; nucleosome disassembly; transcription; negative regulation of proteasomal ubiquitin-dependent protein catabolic process  |
|        | <i>USP12</i>   | c.128A>G p.(Asn43Ser)     | 5           | 0.00000398 | ubiquitin-dependent protein catabolic process; protein deubiquitination                                                                          |

**Supplementary Table 1 cont.** Candidate variants and genes selected in the second-round prioritization, based on post manual curation of biological function. A total of 71 variants in 68 genes were prioritized.

|       |               |                          |      |            |                                                                                                                                                                             |
|-------|---------------|--------------------------|------|------------|-----------------------------------------------------------------------------------------------------------------------------------------------------------------------------|
| SPS.6 | <i>GATA2</i>  | c.121C>G p.(Pro41Ala)    | 3    | 0.000619   | negative regulation of transcription from RNA polymerase II promoter; urogenital system                                                                                     |
|       | <i>HERC2</i>  | c.677A>G p.(Gln226Arg)   | 5    | 0.00000403 | DNA repair; intracellular protein transport; cellular response to DNA damage                                                                                                |
|       | <i>INO80</i>  | c.4271G>C p.(Arg1424Pro) | 5    | 0.00022    | mitotic sister chromatid segregation; double-strand break repair via homologous                                                                                             |
|       | <i>MCM8</i>   | c.876-1delG              | N/A  | N/A        | G1/S transition of mitotic cell cycle; mitotic cell cycle; double-strand break repair via homologous recombination                                                          |
|       | <i>WNK2</i>   | c.6157G>A p.(Val2053Ile) | 5    | 0.0000434  | protein phosphorylation; negative regulation of cell proliferation; regulation of ion homeostasis                                                                           |
| SPS.7 | <i>MYH11</i>  | c.2289A>G p.(Ile763Met)  | 3    | N/A        | muscle contraction; axon guidance; metabolic process; skeletal muscle myosin thick filament assembly                                                                        |
|       |               | c.1913C>T p.(Ser638Leu)  | 4    | 0.0001033  |                                                                                                                                                                             |
|       | <i>DCC</i>    | c.824G>A p.(Arg275Gln)   | 3    | 0.000085   | neuron migration; axonogenesis; apoptotic signaling pathway; regulation of nucleic acid-templated transcription                                                             |
|       | <i>MCM3AP</i> | c.5327T>C p.(Val1776Ala) | 6    | 0.000191   | mRNA transport; nucleosome organization; somatic hypermutation of immunoglobulin genes                                                                                      |
|       | <i>POLD1</i>  | c.1941delG p.(Lys648fs)  | N/A  | N/A        | mitotic cell cycle; telomere maintenance; DNA replication; DNA repair; DNA replication proofreading; DNA damage response                                                    |
| SPS.8 | <i>DAB2IP</i> | c.1460G>A p.(Arg487Gln)  | 6    | 0.000113   | negative regulation of transcription from RNA polymerase II promoter; activation of MAPKKK activity                                                                         |
|       | <i>FAM83H</i> | c.361G>A p.(Glu121Lys)   | 5    | 0.00000806 | biomineral tissue development; intermediate filament cytoskeleton organization; positive regulation of cell migration                                                       |
|       | <i>GGNBP2</i> | c.728G>T p.(Cys243Phe)   | 6    | N/A        | multicellular organismal development; spermatogenesis; cell differentiation; labyrinthine layer blood                                                                       |
|       | <i>MTHFR</i>  | c.919C>T p.(Arg307Trp)   | 5    | N/A        | response to hypoxia; cellular amino acid metabolic process; methionine metabolic process; one-carbon metabolic process; neural tube closure                                 |
|       | <i>RERGL</i>  | c.362T>C p.(Val121Ala)   | 6    | 0.000437   | small GTPase mediated signal transduction                                                                                                                                   |
| SPS.9 | <i>MIA3</i>   | c.4373C>T p.(Ser1458Phe) | 5.25 | 0.0000161  | chondrocyte development; exocytosis; regulation of cell adhesion; protein transport; regulation of cell migration; regulation of bone mineralization; lipoprotein transport |
|       | <i>TNK2</i>   | c.2342G>A p.(Arg781Gln)  | 5    | 0.00004775 | endocytosis; cell surface receptor signaling pathway; phosphorylation; cell migration; cell differentiation; regulation of cell proliferation; innate immune response       |

**Supplementary Table 1 cont.** Candidate variants and genes selected in the second-round prioritization, based on post manual curation of biological function. A total of 71 variants in 68 genes were prioritized.

|        |                |                          |      |           |                                                                                                                                                                             |
|--------|----------------|--------------------------|------|-----------|-----------------------------------------------------------------------------------------------------------------------------------------------------------------------------|
| SPS.10 | <i>THAP11</i>  | c.35A>G p.(Tyr12Cys)     | 5    | N/A       | transcription; regulation of transcription                                                                                                                                  |
|        | <i>CHAF1B</i>  | c.946C>T p.(Arg316Cys)   | 5    | 0.0000141 | reproduction; DNA replication; DNA repair; DNA replication-dependent nucleosome                                                                                             |
| SPS.11 | <i>DOT1L</i>   | c.3307G>A p.(Val1103Met) | 5    | 0.0000349 | chromatin silencing; histone H3-K79 methylation; regulation of JAK-STAT cascade; telomere organization; DNA repair                                                          |
|        | <i>KLF3</i>    | c.275C>T p.(Ser92Leu)    | 4    | 0.000203  | regulation of transcription; multicellular organism development; cellular response to peptide                                                                               |
|        | <i>RASEF</i>   | c.1745C>A p.(Thr582Asn)  | 3    | 0.0000884 | intracellular protein transport; metabolic process; Rab protein signal transduction; small GTPase mediated signal transduction                                              |
|        | <i>SAFB2</i>   | c.1328G>A p.(Arg443His)  | 5    | N/A       | regulation of mRNA processing; regulation of transcription by RNA polymerase II; regulation of androgen receptor signaling pathway                                          |
| SPS.12 | <i>ANXA10</i>  | c.692A>G p.(Asp231Gly)   | 6    | 0.000036  | growth regulation; apoptosis; cell differentiation                                                                                                                          |
|        | <i>CDK9</i>    | c.1060A>G p.(Thr354Ala)  | 3    | 0.0000318 | DNA repair; regulation of DNA repair; transcription                                                                                                                         |
|        | <i>PTCH2</i>   | c.3148C>T p.(Arg1050Trp) | 3.25 | 0.0000119 | signal transduction; epidermis development; negative regulation of smoothened signaling pathway; cell fate determination                                                    |
|        | <i>RALGDS</i>  | c.1337C>T p.(Thr446Ile)  | 5    | N/A       | Ras protein signal transduction; positive regulation of GTPase activity; neurotrophin TRK                                                                                   |
|        | <i>SNRK</i>    | c.1097A>G p.(Lys366Arg)  | 3    | N/A       | protein phosphorylation; myeloid cell differentiation; intracellular signal transduction                                                                                    |
|        | <i>VGLL4</i>   | c.709G>A p.(Val237Met)   | 6    | 0.0000884 | regulation of transcription; negative regulation of <i>Wnt</i> signaling pathway; regulation of cell growth; negative regulation of cardiac muscle cell proliferation       |
| SPS.13 | <i>ASXL1</i>   | c.2110G>A p.(Gly704Arg)  | 6    | 0.000668  | transcription; negative regulation of fat cell differentiation; bone development; bone marrow development; cell morphogenesis; protein deubiquitination; thymus development |
|        | <i>BRCA2</i>   | c.4585G>A p.(Gly1529Arg) | 6    | 0.000401  | double-strand break repair; regulation of transcription; regulation of cytokinesis; oocyte maturation                                                                       |
|        | <i>EPS8</i>    | c.1822A>C p.(Lys608Gln)  | 3    | 0.000337  | Rho-protein signal transduction; sensory perception of sound; positive regulation of ruffle assembly                                                                        |
|        | <i>PTPRT</i>   | c.808C>T p.(Arg270Cys)   | 4    | 0.0000121 | protein dephosphorylation; cell adhesion; homophilic cell adhesion via plasma membrane                                                                                      |
|        | <i>TP53BP1</i> | c.3835G>A p.(Glu1279Lys) | 6    | 0.000008  | DNA repair; positive regulation of transcription; DNA damage checkpoint; protein sumoylation                                                                                |

**Supplementary Table 1 cont.** Candidate variants and genes selected in the second-round prioritization, based on post manual curation of biological function. A total of 71 variants in 68 genes were prioritized.

|        |               |                          |      |            |                                                                                                                                                  |
|--------|---------------|--------------------------|------|------------|--------------------------------------------------------------------------------------------------------------------------------------------------|
| SPS.14 | <i>CFTR</i>   | c.1601C>A p.(Ala534Glu)  | 3    | 0.0000159  | intracellularly ATP-gated chloride channel activity                                                                                              |
|        | <i>FRS3</i>   | c.968A>G p.(Glu323Gly)   | 6    | 0.000136   | signal transduction; fibroblast growth factor receptor signaling pathway; MAPK cascade; positive regulation of GTPase activity                   |
|        | <i>HIC1</i>   | c.1295A>G p.(Gln432Arg)  | 3    | N/A        | regulation of transcription; multicellular organismal development; regulation of <i>Wnt</i> signaling pathway; regulation of DNA damage response |
|        | <i>PIK3R4</i> | c.1838C>T p.(Ser613Phe)  | 6    | N/A        | protein phosphorylation; protein targeting to vacuole; phospholipid metabolic process; innate immune response; regulation of cytokinesis         |
|        | <i>PTPRD</i>  | c.2671T>C p.(Tyr891His)  | 5.25 | 0.0000283  | protein dephosphorylation; phosphate-containing compound metabolic process; heterophilic cell-cell adhesion                                      |
|        | <i>SMPD3</i>  | c.1360G>A p.(Val454Ile)  | 6    | 0.000301   | hematopoietic progenitor cell differentiation; sphingolipid metabolic process; glycosphingolipid metabolic process; cell cycle                   |
| SPS.15 | <i>GSTM3</i>  | c.572G>A p.(Arg191His)   | 3    | 0.0000283  | negative regulation of transcription from RNA polymerase II promoter; cell fate                                                                  |
|        | <i>METTL3</i> | c.1837C>G p.(Leu613Val)  | 5    | N/A        | methylation                                                                                                                                      |
|        | <i>PAMR1</i>  | c.298G>C p.(Gly60Arg)    | 6    | 0.0000424  | metabolic process                                                                                                                                |
|        | <i>PROX1</i>  | c.584C>T p.(Pro195Leu)   | 3    | 0.0000992  | negative regulation of transcription from RNA polymerase II promoter; cell fate                                                                  |
|        | <i>PTCH2</i>  | c.358C>T p.(Arg120Cys)   | 4    | 0.00001591 | signal transduction; epidermis development; smoothened signaling pathway                                                                         |
|        | <i>TRPM8</i>  | c.832C>T p.(Arg278Trp)   | 6    | 0.0000707  | cellular calcium ion homeostasis; thermoception; calcium ion transmembrane transport                                                             |
| SPS.16 | <i>DNMT3B</i> | c.-1_1delCA p.(Met1fs)   | N/A  | 0.000318   | negative regulation of transcription from RNA polymerase II; DNA methylation                                                                     |
|        | <i>HERC1</i>  | c.7642G>C p.(Ala2548Pro) | 3    | N/A        | negative regulation of autophagy; protein ubiquitination; cerebellar Purkinje cell                                                               |
|        | <i>PLCD1</i>  | c.1258C>T p.(Arg420Cys)  | 5    | 0.000262   | angiogenesis; phospholipid metabolic process; lipid catabolic process; intracellular signal                                                      |
|        | <i>RB1CC1</i> | c.4540C>T p.(Arg1514Cys) | 5    | 0.000217   | autophagic vacuole assembly; liver development; positive regulation of protein                                                                   |
|        | <i>VWF</i>    | c.1625C>G p.(Ala542Gly)  | 3    | 0.000689   | extracellular matrix organization; platelet degranulation; cell adhesion; blood coagulation                                                      |

Pred. tools: score given by the in-house pipeline based on missense pathogenicity prediction tools (0-6). gnomAD, genome aggregation database variant frequency. N/A, Non-available.

**Supplementary Table 2.** Two-hit SNVs identification from paired germline-somatic WES data.

| Family | Gene                     | Tissue | Variant                  | Pred. tools | gnomAD     | Biological process                                                         |
|--------|--------------------------|--------|--------------------------|-------------|------------|----------------------------------------------------------------------------|
| SPS.7  | <i>PTPRS</i>             | G      | c.3487C>T p.(Arg1163Cys) | 4           | 0.000012   | neurological development; protein                                          |
|        |                          | S      | c.2975C>T p.(Ala992Val)  | 4           | 0.01982    | dephosphorylation; synapse organization                                    |
|        | <i>MCM3A</i><br><i>P</i> | G      | c.5327T>C p.(Val1776Ala) | 6           | 0.000191   | immune system process; DNA replication;                                    |
|        |                          | S      | c.5038+2T>C              | N/A         | N/A        | protein import into nucleus; mRNA transport                                |
|        | <i>CABIN1</i>            | G      | c.6542C>T p.(Ser2181Phe) | 6           | 0.0000248  | DNA replication-independent nucleosome                                     |
|        |                          | S      | c.358G>T p.(Asp120Tyr)   | 6           | N/A        | assembly; cell surface receptor signaling pathway; chromatin modification; |
|        | <i>EIF4G1</i>            | G      | c.2266G>A p.(Gly756Arg)  | 4           | 0.00001417 | gene expression; cytokine-mediated signaling                               |
|        |                          | S      | c.582A>T p.(Gln194His)   | 5           | N/A        | pathway; mitochondrion organization; negative                              |
|        |                          | S      | c.3362G>A p.(Arg1121His) | 5           | N/A        | regulation of autophagy; regulation cell cycle                             |
|        | <i>PHF19</i>             | G      | c.710G>A p.(Arg237Gln)   | 5.25        | 0.0000319  | regulation of transcription; chromatin                                     |
|        |                          | S      | c.146G>A p.(Arg49Gln)    | 6           | 0.0000106  | modification; regulation of gene expression, epigenetic                    |

Pred. tools: score given by the in-house pipeline based on missense pathogenicity prediction tools (0-6). gnomAD, genome aggregation database variant frequency. G, germline; S, somatic; N/A, Not Available.

**Supplementary Table 3.** Germline candidate variants and genes for predisposition to serrated polyposis syndrome identified by ALFRED analysis to present loss of heterozygosity (LOH) in the paired tumor /somatic sample.

| Family | Gene            | Location    | Germline variant         | Pred. tools | gnomAD     |
|--------|-----------------|-------------|--------------------------|-------------|------------|
| SPS.1  | <i>SGSM3</i>    | 22:40803845 | c.1577G>A p.(Arg526Gln)  | 5           | 0.000264   |
|        | <i>DOCK2</i>    | 5:169496186 | c.4690G>A p.(Asp1564Asn) | 3           | 0.0000602  |
| SPS.2  | <i>F13A1</i>    | 6:6305670   | c.233G>A p.(Arg78His)    | 3.75        | 0.0000159  |
|        | <i>UTRN</i>     | 6:144768755 | c.1740G>A p.(Met580Ile)  | 4           | 0.000427   |
|        | <i>KCNH2</i>    | 7:150644718 | c.1921A>G p.(Ser641Gly)  | 3           | N/A        |
| SPS.4  | <i>CEP192</i>   | 18:13073117 | c.5549C>G p.(Ser1850Cys) | 6           | 0.000103   |
| SPS.6  | <i>ATG2B</i>    | 14:96756034 | c.5965C>G p.(Leu1989Val) | 5           | 0.000569   |
|        | <i>TIAM1</i>    | 21:32575246 | c.2471C>T p.(Pro824Leu)  | 3           | 0.0000424  |
| SPS.7  | <i>DNM3</i>     | 1:172002257 | c.701T>G p.(Val234Gly)   | 6           | N/A        |
|        | <i>MCM3AP</i>   | 21:47662815 | c.5327T>C p.(Val1776Ala) | 6           | 0.000191   |
|        | <i>USP18</i>    | 22:18653593 | c.797C>T p.(Thr266Met)   | 3           | 0.00000758 |
|        | <i>PDLIM2</i>   | 8:22442603  | c.389C>T p.(Pro130Leu)   | 3           | 0.00001990 |
|        | <i>PHF19</i>    | 9:123629148 | c.710G>A p.(Arg237Gln)   | 5.25        | 0.0000319  |
|        |                 |             |                          |             |            |
| SPS.8  | <i>TENM2</i>    | 5:167642142 | c.3916T>A p.(Ser1306Thr) | 5           | N/A        |
| SPS.11 | <i>ARHGEF16</i> | 1:3383881   | c.784A>G p.(Thr262Ala)   | 4           | 0.000412   |
|        | <i>SLCO4A1</i>  | 20:61300405 | c.2000T>G p.(Ile667Arg)  | 3           | 0.0000482  |
|        | <i>KLF3</i>     | 4:38690423  | c.275C>T p.(Ser92Leu)    | 4           | 0.000203   |
| SPS.12 | <i>TXNRD2</i>   | 22:19898900 | c.662C>T (p.Thr221Met)   | 6           | 0.000057   |
|        | <i>TXNRD2</i>   | 22:19898906 | c.656G>C (p.Gly219Ala)   | 6           | 0.000303   |
| SPS.13 | <i>ADAMTS14</i> | 10:72509652 | c.2347G>A (p.Ala783Thr)  | 5           | 0.0000239  |
|        | <i>CHD1</i>     | 5:98233967  | c.1358A>G p.(Asp453Gly)  | 3           | N/A        |
|        | <i>CD93</i>     | 20:23066529 | c.301A>T p.(Lys101*)     | 3.25        | N/A        |
|        | <i>HLA-DQA1</i> | 6:32610752  | c.637G>T p.(Glu213*)     | 3.5         | 0.0000725  |
|        | <i>HIC1</i>     | 17:1961279  | c.1295A>G. p.(Gln432Arg) | 3           | N/A        |
|        | <i>PCDH1</i>    | 5:141244937 | c.959A>C p.(His320Pro)   | 4           | 0.000114   |
| SPS.14 | <i>TENM2</i>    | 5:167689642 | c.8125G>A p.(Gly2709Arg) | 6           | 0.0000395  |
|        | <i>CFTR</i>     | 7:117227809 | c.1601C>A p.(Ala534Glu)  | 3           | 0.0000159  |
|        | <i>C12orf55</i> | 12:96883648 | c.266delA p.(Lys89fs)    | N/A         | N/A        |
| SPS.15 | <i>SKA3</i>     | 13:21732060 | c.1119+1G>C              | N/A         | 0.0002216  |

Pred. tools: score given by the in-house pipeline based on missense pathogenicity prediction tools (0-6).  
gnomAD, genome aggregation database variant frequency. N/A, Not Available

**Supplementary Table 4.** Identified mutations in the most relevant cancer driver genes. *POLE/POLD1*, *MMR* genes (*MLH1*, *MLH3*, *MSH2*, *MSH3*, *MSH6*, *PMS2*), *BRAF* and *KRAS* were analyzed in the individuals with somatic whole-exome sequencing.

| Family | Gene        | Mutation         | AAF (%) | ClinVar      |
|--------|-------------|------------------|---------|--------------|
| SPS.1  | <i>BRAF</i> | V600E            | 17%     | Pathogenic   |
| SPS.2  | <i>MSH3</i> | K383fs           | 12%     | Not rep.     |
|        |             | Y789delins*LFHIL | 2.50%   | Not rep.     |
|        | <i>MSH6</i> | T1085fs          | 4%      | Pathogenic   |
|        | <i>BRAF</i> | V600E            | 38%     | Pathogenic   |
| SPS.3  | <i>POLE</i> | L570fs           | 11%     | Not rep.     |
|        | <i>BRAF</i> | V600E            | 19%     | Pathogenic   |
| SPS.4  | <i>MLH3</i> | S748fs           | 2%      | Not rep.     |
|        | <i>MSH3</i> | T480K            | 7%      | Not rep.     |
| SPS.6  | <i>BRAF</i> | V600E            | 25%     | Pathogenic   |
| SPS.7  | <i>POLE</i> | H1820Y           | 12%     | Not rep.     |
|        | <i>MLH1</i> | R687Q            | 20%     | VUS          |
|        | <i>MSH2</i> | C333R            | 18%     | Likely Path. |
|        | <i>BRAF</i> | V600E            | 26%     | Pathogenic   |
| SPS.8  | <i>POLE</i> | V246fs           | 5%      | Not rep.     |
|        |             | H6111fs          | 3%      | Not rep.     |
|        | <i>MLH3</i> | S490fs           | 2%      | Not rep.     |
|        |             | S111fs           | 1.40%   | Not rep.     |
|        |             | K676Q            | 1.60%   | Not rep.     |
|        | <i>MSH6</i> | K311fs           | 4%      | Not rep.     |
|        |             | K676fs           | 1.60%   | Not rep.     |
|        |             | P982fs           | 2.40%   | Not rep.     |
| SPS.9  | <i>BRAF</i> | V600E            | 9%      | Pathogenic   |
| SPS.11 | <i>MSH3</i> | R938fs           | 4%      | Not rep.     |
| SPS.14 | <i>MSH2</i> | C778fs           | 2%      | Not rep.     |
|        | <i>MSH6</i> | Y730fs           | 2%      | Not rep.     |
|        | <i>KRAS</i> | A146T            | 53%     | VUS          |
| SPS.15 | <i>BRAF</i> | V600E            | 23%     | Pathogenic   |

There was no somatic data available for families SPS.5 and SPS.10. SPS.16 tumor sample was unpaired with the germline counterpart so somatic variants for this sample are not shown. The table shows all mutations identified in the cancer driver. The table shows all mutations identified in the cancer driver genes regardless the AAF > 20% filter. AAF, alternative allele frequency; Not rep., not reported; Likely Path., likely pathogenic.

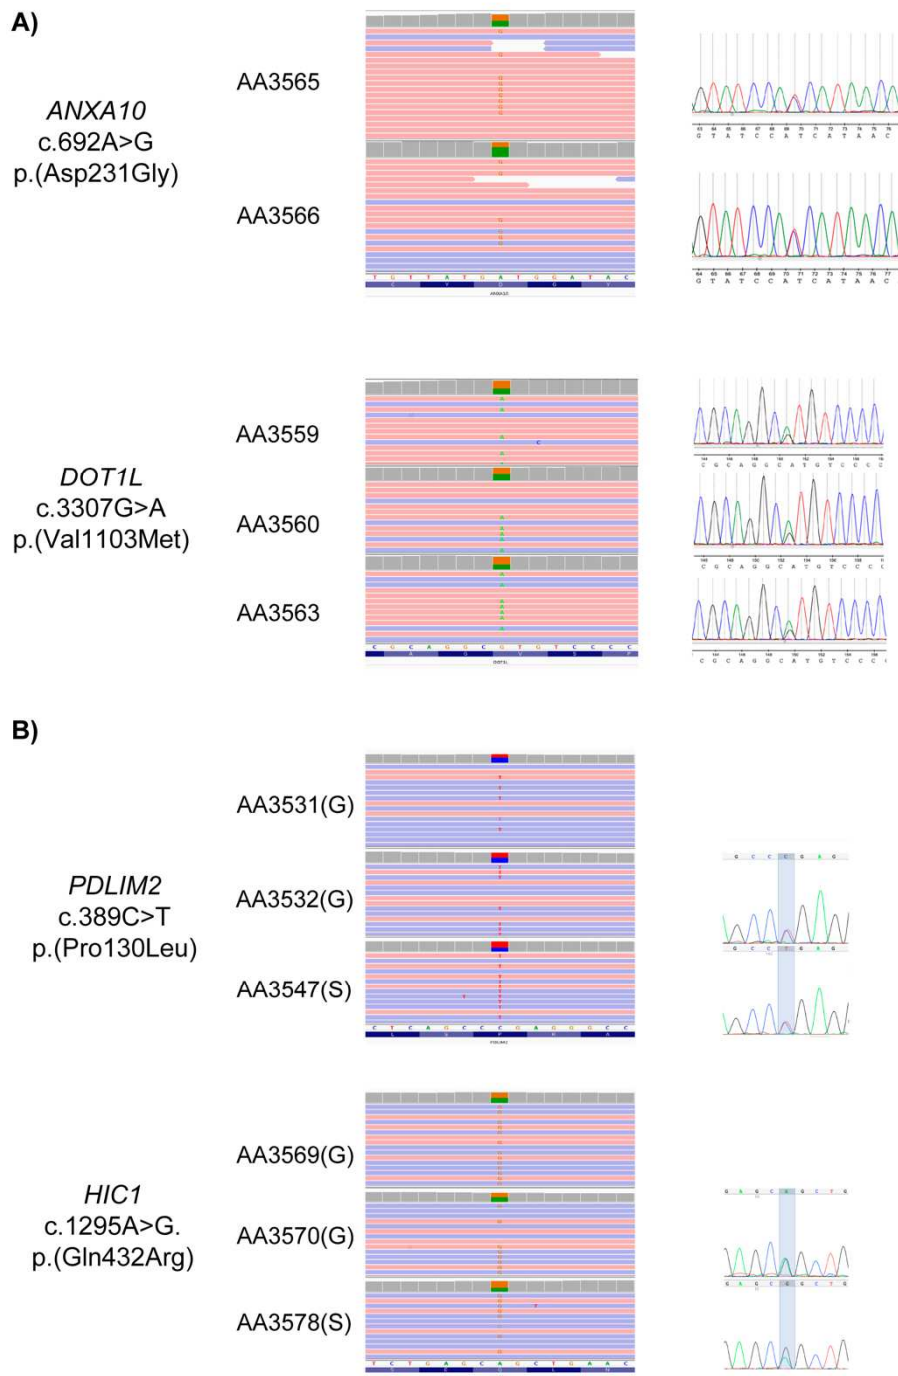

**Supplementary Figure 1.** A) Sanger sequencing validation of germline variants identified by WES in *ANXA10* (family SPS.12) and *DOT1L* (family SPS.11). Manual inspection using Integrative Genome Viewer (IGV) and the corresponding Sanger sequencing validation. B) Paired germline and somatic WES analysis using ALFRED suggested *PDLIM2* (family SPS.7) and *HIC1* (family SPS.14) as candidate genes undergoing two-hit inactivation. Genetic variants in germline (G) and somatic (S) DNA samples were verified by IGV, and LOH was validated using Sanger sequencing in both germline and somatic samples.
