# Supplementary material for: Germline and Somatic Whole-Exome Sequencing Identifies New Candidate Genes Involved in Familial Predisposition to Serrated Polyposis Syndrome
Source: MDPI journal article supplement (doi:10.3390/cancers13040929), 2021-02-23

A)

*ANXA10*  
c.692A>G  
p.(Asp231Gly)

AA3565

AA3566

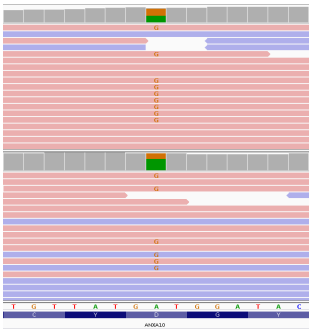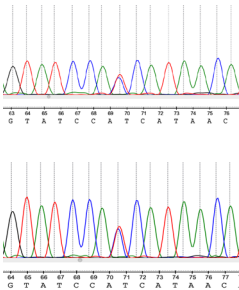

*DOT1L*  
c.3307G>A  
p.(Val1103Met)

AA3559

AA3560

AA3563

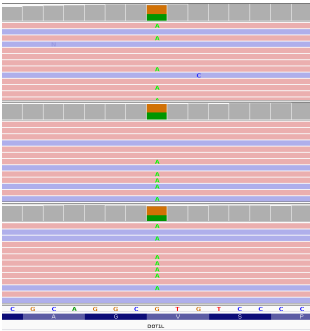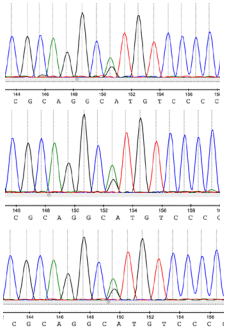

B)

*PDLIM2*  
c.389C>T  
p.(Pro130Leu)

AA3531(G)

AA3532(G)

AA3547(S)

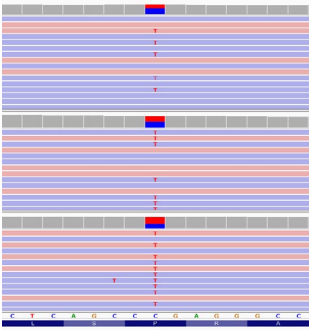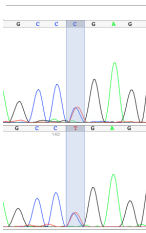

*HIC1*  
c.1295A>G.  
p.(Gln432Arg)

AA3569(G)

AA3570(G)

AA3578(S)

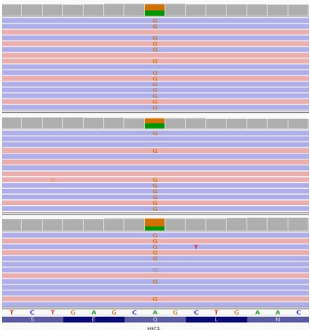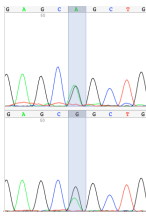

Supplement: s1 [file s1]
